# Supplementary material
Source: PubMed Central journal article supplement (PMC3000664)
Supplement: bph0161-1414-SD1.pdf [file bph0161-1414-SD1.pdf]

# Ranolazine Selectively Blocks Persistent Current Evoked by Epilepsy-associated $\text{Na}_v1.1$ Mutations

Kristopher M. Kahlig, Irene Lepist, Kwan Leung, Sridharan Rajamani,  
and Alfred L. George, Jr.

## Supplemental Figure

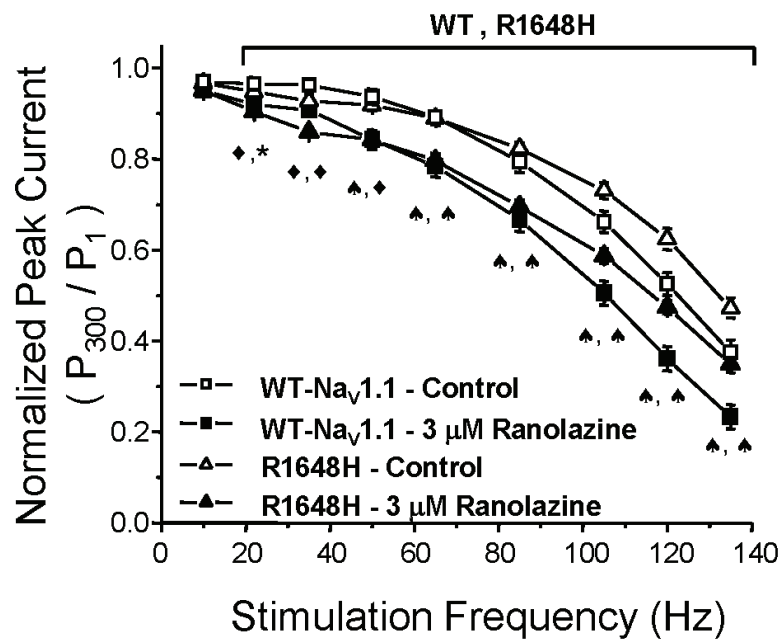

### Supplemental Figure 1 - Ranolazine (3 $\mu\text{M}$ ) inhibits use-dependent current.

WT- $\text{Na}_v1.1$  and R1648H availability during repetitive stimulation was assessed with a depolarizing pulse train (-10 mV, 5 ms, 300 pulses) at frequencies between 10 and 135 Hz during sequential superfusion of control solution followed by 3  $\mu\text{M}$  ranolazine. Normalized peak current (pulse 300 / pulse 1) was plotted versus frequency for each pulse train ( $n = 9$  and 8, respectively).
